# Supplementary material
Source: Springer Nature journal article supplement (https://www.springermedizin.de/resource/supplementary/12889_2010_2438_MOESM2_ESM.pdf/9485858)
Supplement: MOESM2 [file 9485858]

Approached N = 432

```
graph TD; A[Approached N = 432] --> B[Recruited N = 394]; A -- Refusal N = 38 --> R[Refusal N = 38]; B --> C[Prenatal care trajectory N = 333]; B -- Stop N = 10 --> S[Stop N = 10]; B -- Miscarriage N = 33 --> M[Miscarriage N = 33]; B -- Lost to follow up N = 18 --> L[Lost to follow up N = 18];
```

Refusal N = 38

Recruited N = 394

Stop (N=10)

Miscarriage (N=33)

Lost to follow up (N=18)

Prenatal care trajectory N = 333
